# Supplementary material for: Lithium salt-regulated dual-stabilized elastomeric quasi-solid electrolyte for high-voltage lithium metal batteries
Source: Royal Society of Chemistry journal article supplement (doi:10.1039/d2ta09157g), 2023-01-01
Supplement: d2ta09157g1.pdf [file d2ta09157g1.pdf]

## Supporting information

### **Lithium salts regulated dual-stabilized elastomeric quasi-solid electrolyte for high-voltage lithium metal battery**

**Yali Liu<sup>a,b</sup>, Youlong Xu<sup>a,b,\*</sup>, Jing Wang<sup>a,b</sup>, Yao Niu<sup>a,b</sup>, Xiangdong Ding<sup>c</sup>**

<sup>a</sup> Electronic Materials Research Laboratory, Key Laboratory of the Ministry of Education & International Center for Dielectric Research, Xi'an Jiaotong University, Xi'an 710049, China

<sup>b</sup> Shaanxi Engineering Research Center of Advanced Energy Materials & Devices, Xi'an Jiaotong University, No. 28, West Xianning Road, Xi'an 710049, China

<sup>c</sup> State Key Laboratory for Mechanical Behavior of Materials, Xi'an Jiaotong University, Xi'an 710049, China

\*Corresponding author.

E-mail address: [ylxu@mail.xjtu.edu.cn](mailto:ylxu@mail.xjtu.edu.cn)

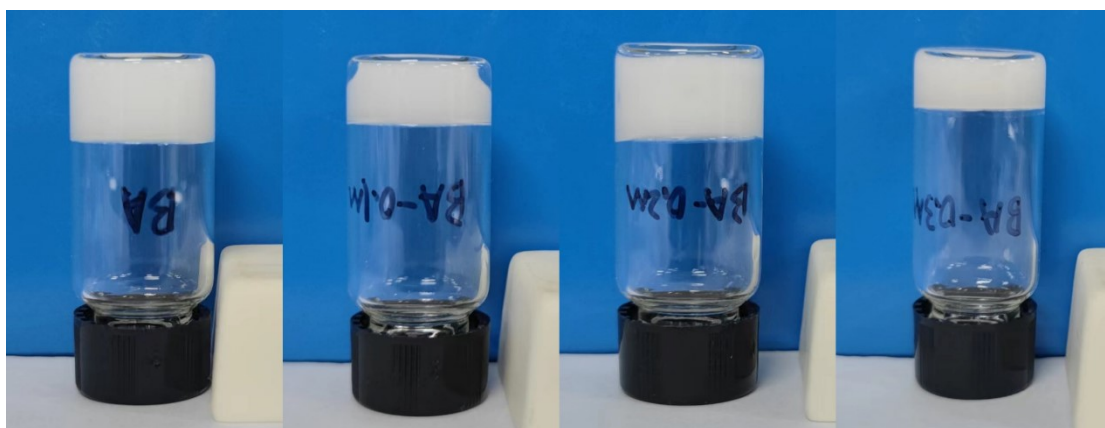

**Fig.S1.** the optical images of the polymerized elastomeric electrolytes with different amounts of LiDFOB.

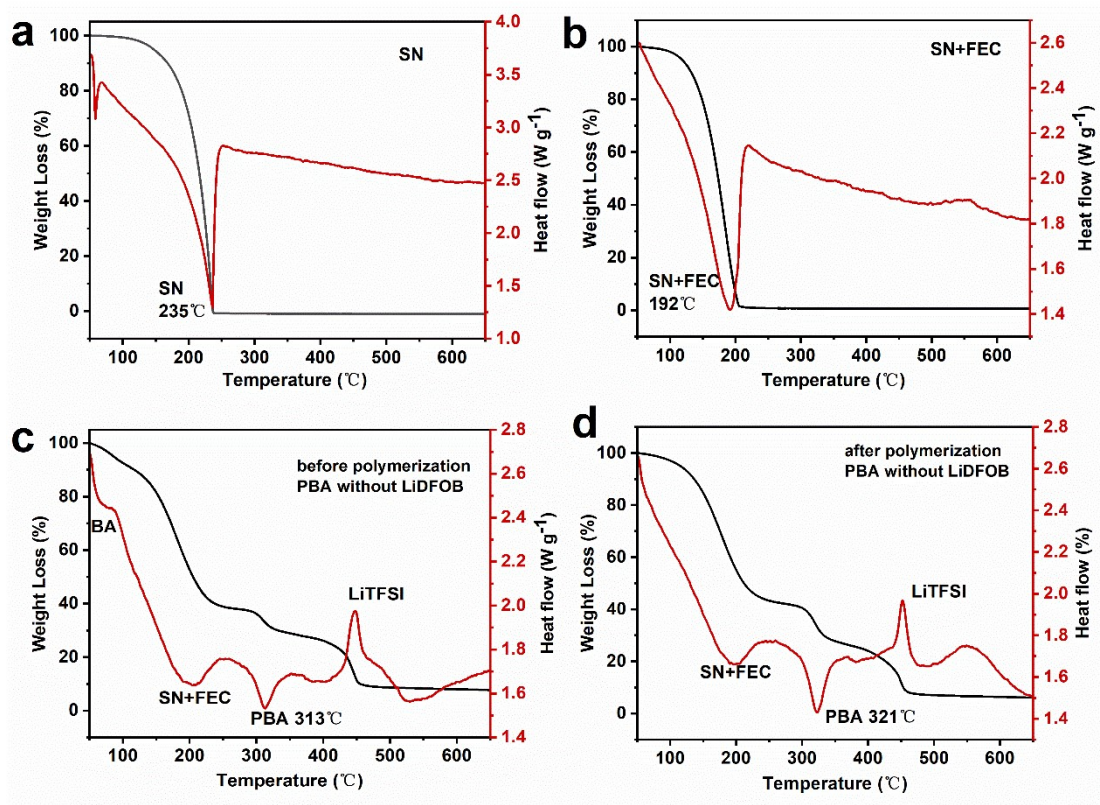

**Fig.S2.** TG-DSC profiles of SN (a), SN+FEC (b) and the precursors without LiDFOB, before polymerization (c) and after polymerization (d).

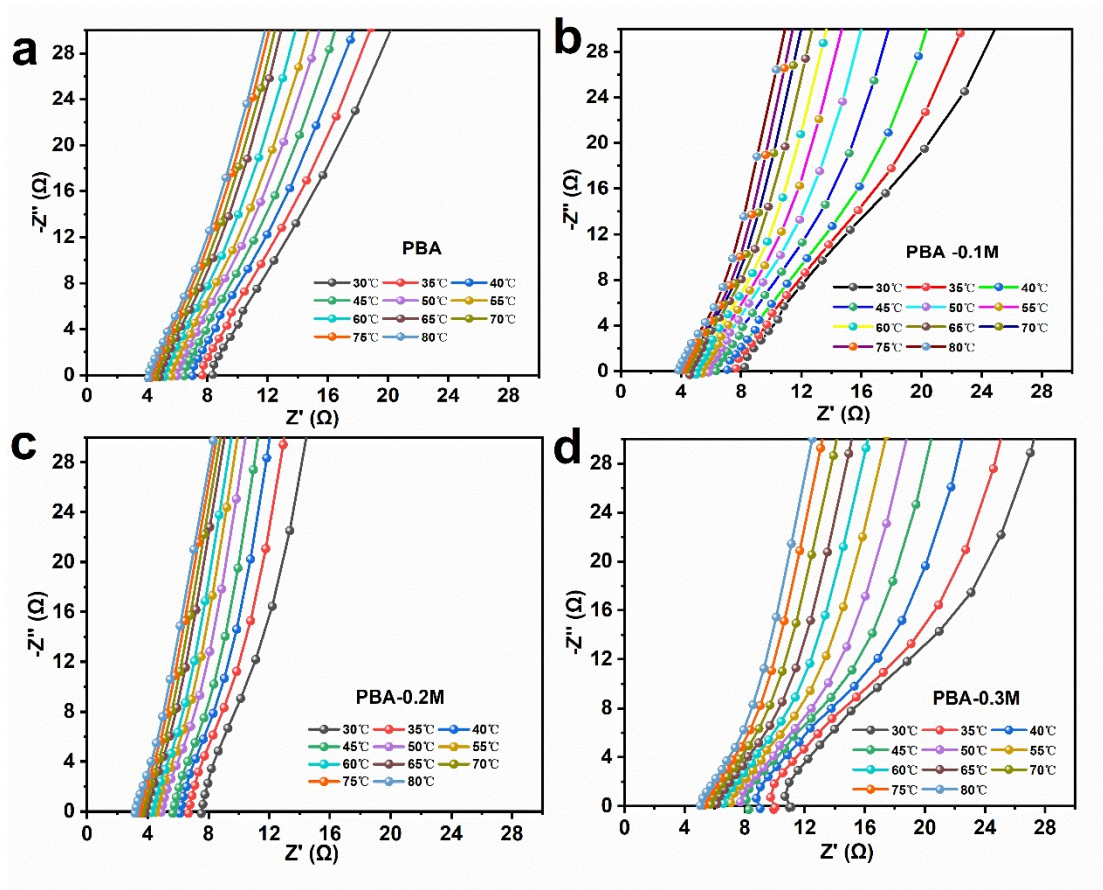

**Fig.S3.** The EIS profiles with different temperature (30~80 °C) of the polymerized elastomeric electrolytes with different amount of LiDFOB, (a) PBA, (b) PBA-0.1M, (c) PBA-0.2M and (d) PBA-0.3M.

**Tab.S1.** The calculation for ionic conductivity of the prepared QSEs.

| Type of QSE | Thickness L ( $\mu\text{m}$ ) | Bulk Resistance R ( $\Omega$ ) | Contact area S ( $\text{cm}^2$ ) | Ionic conductivity $\sigma$ ( $\text{S cm}^{-1}$ ) |
|-------------|-------------------------------|--------------------------------|----------------------------------|----------------------------------------------------|
| PBA         | 25                            | 8.39                           | 1.766                            | $1.69 \times 10^{-4}$                              |
| PBA-0.1M    | 25                            | 8.29                           | 1.766                            | $1.70 \times 10^{-4}$                              |
| PBA-0.2M    | 25                            | 7.63                           | 1.766                            | $1.86 \times 10^{-4}$                              |
| PBA-0.3M    | 25                            | 10.68                          | 1.766                            | $1.28 \times 10^{-4}$                              |

The diameter of SS is about 15 cm.

**Tab. S2.** The calculation for the Li transference number of the prepared QSEs.

| Type of QSE | $I_0$ ( $\mu\text{A}$ ) | $I_{ss}$ ( $\mu\text{A}$ ) | $R_1$ ( $\Omega$ ) | $R_2$ ( $\Omega$ ) | $t_{\text{Li}^+}$ |
|-------------|-------------------------|----------------------------|--------------------|--------------------|-------------------|
| PBA         | 34.02                   | 29.46                      | 232.3              | 237.6              | 0.63              |
| PBA-0.2M    | 40.43                   | 36.88                      | 219.2              | 228.5              | 0.66              |



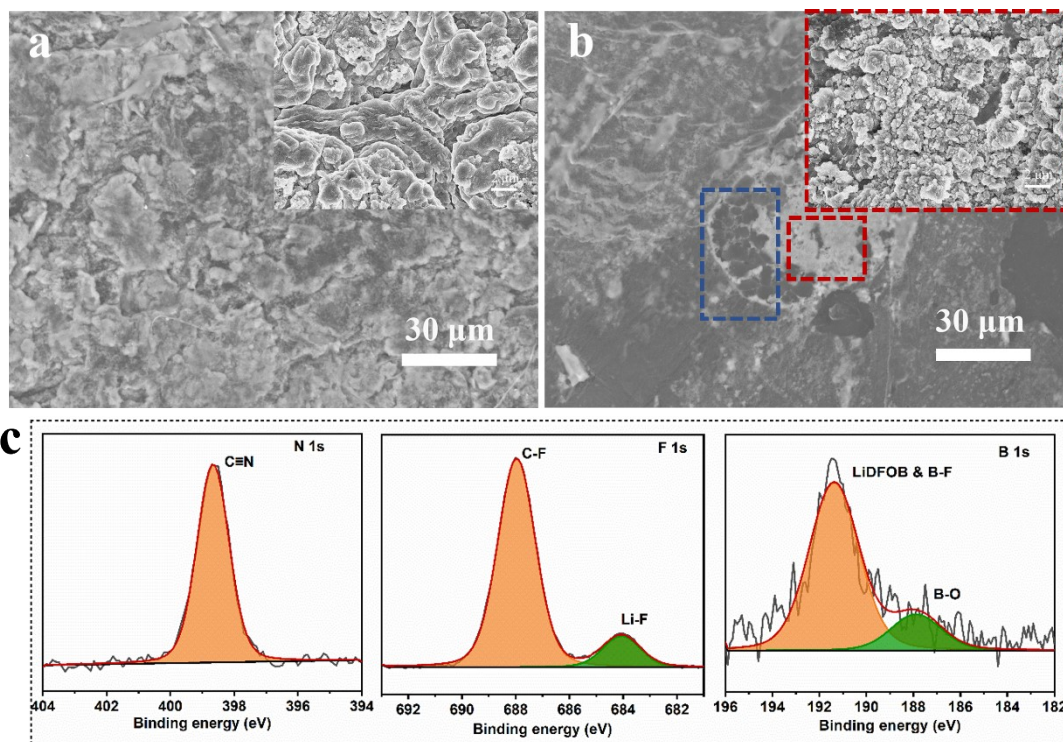

**Fig.S4.** SEM image of cycled lithium metal anodes in Li|PBA-0.1M|Li (a) and Li|PBA-0.3M|Li (b) symmetrical cells after 100 cycles at at  $0.1 \text{ mA cm}^{-2}$  and  $0.1 \text{ mAh cm}^{-2}$ .(c) XPS results of lithium anode from dissembled Li/PBA-0.3M/Li symmetric cell.

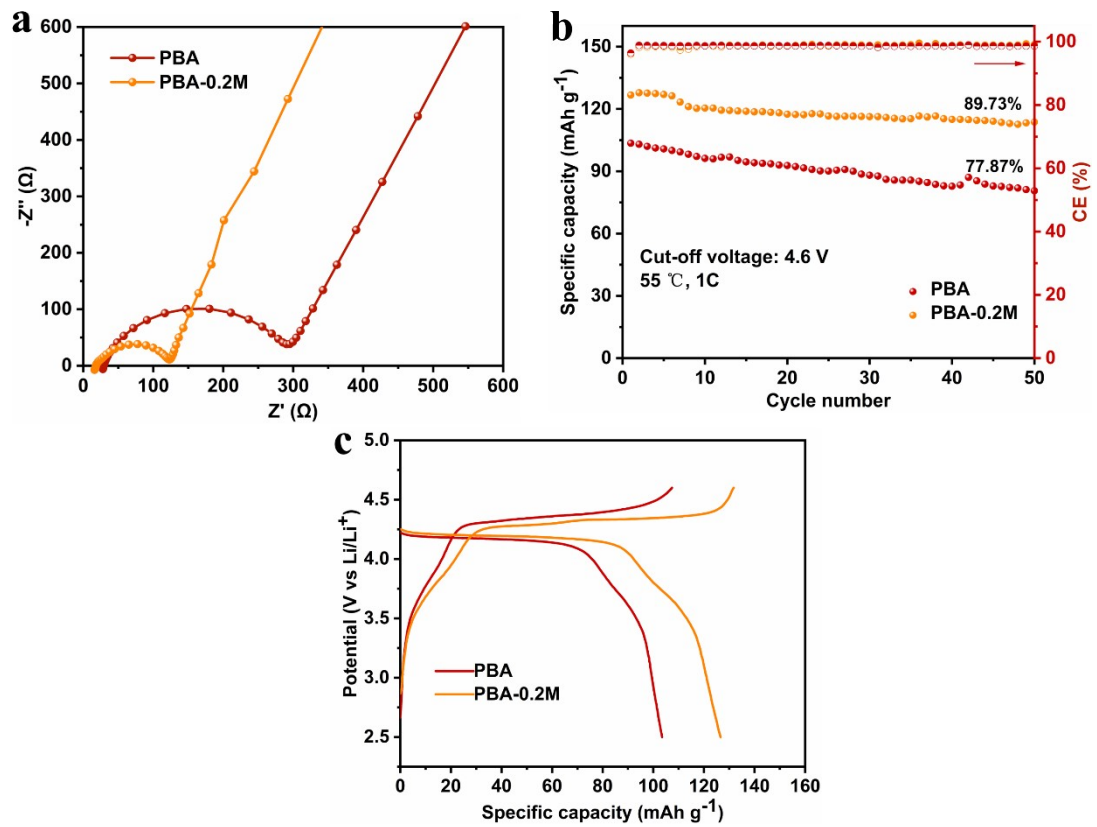

**Fig.S5.** (a) Nyquist plots of the Li/PBA/LiVPO<sub>4</sub>F and Li/PBA-0.2M/LiVPO<sub>4</sub>F with initial cycle at room temperature. (b) Cycling performance of Li/PBA/LiVPO<sub>4</sub>F and Li/PBA-0.2M/LiVPO<sub>4</sub>F cells at 55 °C. (c) The initial charge-discharge curves at of Li/PBA/LiVPO<sub>4</sub>F and Li/PBA-0.2M/LiVPO<sub>4</sub>F cells at 55 °C

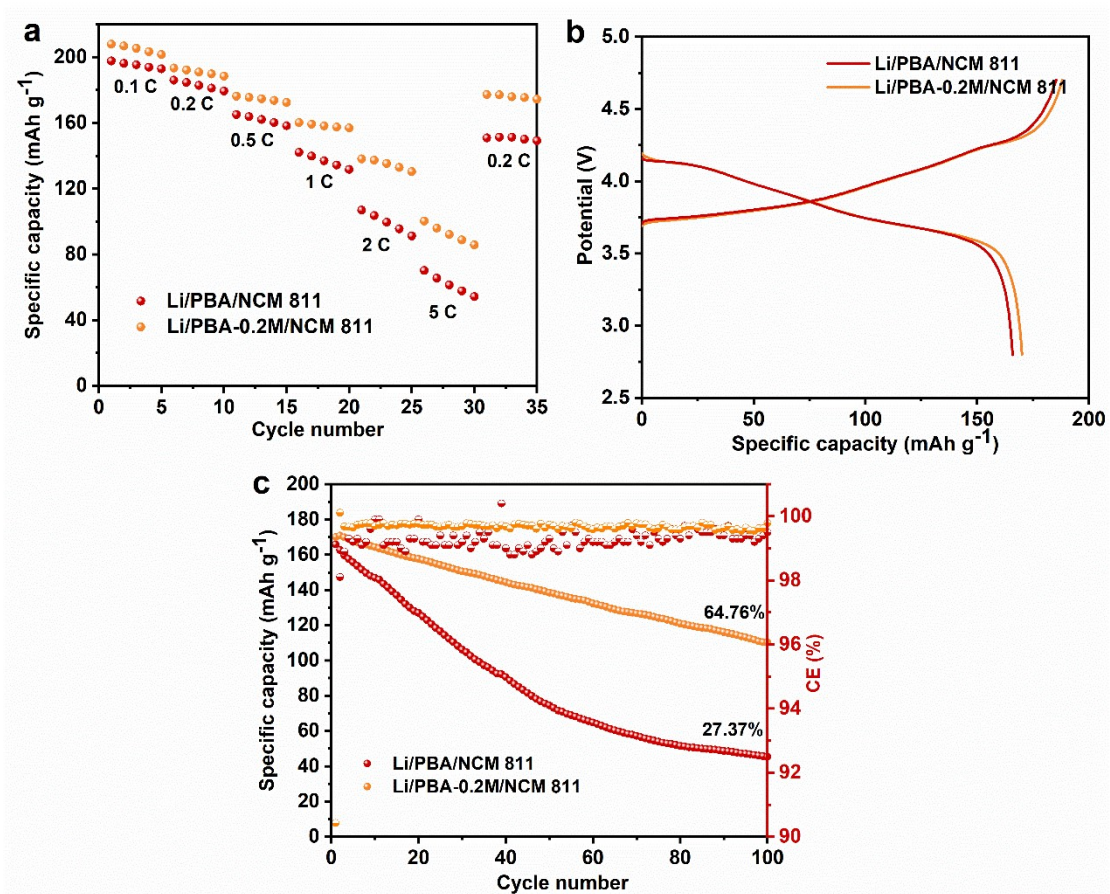

**Fig.S6.** Battery performance of Li/PBA/NCM811 and Li/PBA-0.2M/NCM 811 cells (a) Rate performance; (b) The initial charge-discharge curves; (c) Cycling performance.



**Tab. S3.** Comparison of ionic conductivity, electrochemical window and battery performance with different elastomeric electrolytes

| System                                                 | Thickness                 | Ionic conductivity (25°C)                 | Electro-chemical Window | tLi+    | Li/Li cell performance                                         | Battery performance and cut-off voltage                                                                                 | Literature       |
|--------------------------------------------------------|---------------------------|-------------------------------------------|-------------------------|---------|----------------------------------------------------------------|-------------------------------------------------------------------------------------------------------------------------|------------------|
| PBA20 (Gel)<br>LiFSI in EA/TM<br>P/FEC                 | 25 μm<br>Celgard<br>2400  | 3.3×10 <sup>-4</sup> S cm <sup>-1</sup>   | 4.27 V                  | 0.63    | ~500 h<br>(unclear)                                            | LFP/ Li metal cell<br>153mAh g <sup>-1</sup> , 1C<br>,94% after 500 cycles<br>3C, 114 mAh g <sup>-1</sup><br><b>4 V</b> | [1]              |
| PBA in GF<br>LiTFSI in EA/TM<br>P/FEC                  | Glass<br>Fiber<br>≥200 μm | 2.52×10 <sup>-4</sup> S cm <sup>-1</sup>  | 5.04 V                  | 0.56    | 0.1 mA cm <sup>-1</sup><br>0.1 mAh cm <sup>-1</sup><br>~260 h  | LFP/Li cell<br>67.66 mAh g <sup>-1</sup> ,<br>1C<br>44.92 mAh g <sup>-1</sup> ,<br>2C<br><b>3.9 V</b>                   | [2]              |
| PU-EO <sub>12</sub> /Li<br>TFSI/T<br>EG <sub>41%</sub> | unclear                   | 4.8 × 10 <sup>-4</sup> S cm <sup>-1</sup> | ~5 V                    | 0.4     | 0.1 mA cm <sup>-1</sup><br>0.1 mAh cm <sup>-1</sup><br>2200 h  | LFP/Li cell<br>133.0 mA h g <sup>-1</sup> ,<br>,0.5 C, 99.14%<br>after 450 cycles<br><b>4.0 V</b>                       | [3]              |
| NBR/IB<br>IL<br>LiTFSI                                 | 120 μm                    | 2.7 × 10 <sup>-4</sup> S cm <sup>-1</sup> | 4.6 V                   | unclear | 0.25 mA cm <sup>-1</sup><br>0.05 mAh cm <sup>-1</sup><br>600 h | LFP/Li cell<br>146 mA h g <sup>-1</sup> , 0.5<br>C, 94.3% after<br>300 cycles<br><b>4.0 V</b>                           | [4]              |
| PBA-<br>TMP-<br>LiNO <sub>3</sub><br>QSE               | 25 μm                     | 2×10 <sup>-3</sup> S cm <sup>-1</sup>     | 4.6 V                   | 0.8     | unclear                                                        | LFP/Li cell<br>~ 155 mAh g <sup>-1</sup><br>1C, 92% 700<br>cycles<br><b>4.0 V</b>                                       | [5]              |
| PBA-<br>PVDF<br>GPE                                    | 100 μm                    | 8.1×10 <sup>-4</sup> S cm <sup>-1</sup>   | 4.5 V                   | unclear | unclear                                                        | LFP/Li cell<br>85 mAh g <sup>-1</sup><br>after 100 cycles<br><b>3.8 V</b>                                               | [6]              |
| PBA-<br>FEC-SN                                         | 25 μm                     | 1.86×10 <sup>-4</sup> S cm <sup>-1</sup>  | <b>5.36 V</b>           | 0.67    | 0.5 mA cm <sup>-1</sup><br>0.5 mAh cm <sup>-1</sup><br>600 h   | Li/LiVPO <sub>4</sub> F cell<br>121.5 mAh g <sup>-1</sup> ,<br>1C ~84.03% after<br>100 cycles, <b>4.7 V</b>             | <b>This work</b> |

## References

1. Zhou, G., X. Lin, J. Liu, J. Yu, J. Wu, H.M. Law, Z. Wang, and F. Ciucci, *Energy Stor. Mater.*, 2021, **34**, 629-639.
2. Wu, S., H. Zheng, R. Tian, Z. Hei, H. Liu, and H. Duan, *J. Power Sources*, 2020, **472**, 228627.
3. Guo, Y., X. Qu, Z. Hu, J. Zhu, W. Niu, and X. Liu, *J. Mater. Chem. A*, 2021, **9**, 13597-13607.
4. Shi, Y., N. Yang, J. Niu, S. Yang, and F. Wang, *Adv. Sci.*, 2022, **9**, 2200553.
5. Zhou, G., J. Yu, J. Liu, X. Lin, Y. Wang, H.M. Law, and F. Ciucci, *Cell Reports Physical Science*, 2022, **3**, 100722.
6. Wu, X., Y. Liu, Q. Yang, S. Wang, G. Hu, and C. Xiong, *Ionics*, 2017, **23**, 2319-2325.
